# Supplementary material
Source: PubMed Central journal article supplement (PMC6802253)

## Supplementary Online Content

Greenwood TA, Lazzeroni LC, Maihofer AX, et al. Genome-wide association of endophenotypes for schizophrenia from the Consortium on the Genetics of Schizophrenia (COGS) study. *JAMA Psychiatry*. Published online October 9, 2019. doi:10.1001/jamapsychiatry.2019.2850

**eTable.** Correlations Among All 11 Endophenotypes

**eFigure.** Quantile-Quantile Plots for Each of the 11 Endophenotypes

This supplementary material has been provided by the authors to give readers additional information about their work.

**eTable.** Correlations Among All 11 Endophenotypes

|        | PPI               | AS                      | CVLT                    | DS-CPT            | LNS                     | ABF                     | FMEM                    | SMEM                    | SPA                     | S-M                     |
|--------|-------------------|-------------------------|-------------------------|-------------------|-------------------------|-------------------------|-------------------------|-------------------------|-------------------------|-------------------------|
| AS     | 0.13 <sup>c</sup> |                         |                         |                   |                         |                         |                         |                         |                         |                         |
| CVLT   | 0.05              | <b>0.45<sup>c</sup></b> |                         |                   |                         |                         |                         |                         |                         |                         |
| DS-CPT | 0.13 <sup>c</sup> | <b>0.33<sup>c</sup></b> | <b>0.31<sup>c</sup></b> |                   |                         |                         |                         |                         |                         |                         |
| LNS    | 0.10 <sup>a</sup> | <b>0.41<sup>c</sup></b> | <b>0.52<sup>c</sup></b> | 0.27 <sup>c</sup> |                         |                         |                         |                         |                         |                         |
| ABF    | 0.14 <sup>c</sup> | <b>0.32<sup>c</sup></b> | <b>0.35<sup>c</sup></b> | 0.22 <sup>c</sup> | <b>0.37<sup>c</sup></b> |                         |                         |                         |                         |                         |
| FMEM   | 0.05              | <b>0.35<sup>c</sup></b> | <b>0.35<sup>c</sup></b> | 0.21 <sup>c</sup> | <b>0.32<sup>c</sup></b> | <b>0.36<sup>c</sup></b> |                         |                         |                         |                         |
| SMEM   | 0.09 <sup>a</sup> | <b>0.34<sup>c</sup></b> | <b>0.34<sup>c</sup></b> | 0.20 <sup>c</sup> | <b>0.33<sup>c</sup></b> | <b>0.46<sup>c</sup></b> | <b>0.57<sup>c</sup></b> |                         |                         |                         |
| SPA    | 0.08 <sup>a</sup> | <b>0.43<sup>c</sup></b> | <b>0.40<sup>c</sup></b> | 0.28 <sup>c</sup> | <b>0.43<sup>c</sup></b> | <b>0.49<sup>c</sup></b> | <b>0.46<sup>c</sup></b> | <b>0.44<sup>c</sup></b> |                         |                         |
| S-M    | 0.05              | <b>0.42<sup>c</sup></b> | <b>0.39<sup>c</sup></b> | 0.22 <sup>c</sup> | <b>0.36<sup>c</sup></b> | <b>0.43<sup>c</sup></b> | <b>0.50<sup>c</sup></b> | <b>0.44<sup>c</sup></b> | <b>0.56<sup>c</sup></b> |                         |
| EMO    | 0.12 <sup>b</sup> | <b>0.45<sup>c</sup></b> | <b>0.42<sup>c</sup></b> | 0.24 <sup>c</sup> | <b>0.42<sup>c</sup></b> | <b>0.43<sup>c</sup></b> | <b>0.57<sup>c</sup></b> | <b>0.47<sup>c</sup></b> | <b>0.54<sup>c</sup></b> | <b>0.59<sup>c</sup></b> |

All endophenotype values used for comparison represent standardized residuals adjusted for age (AS, CVLT, DS-CPT, LNS, ABF, FMEM, SMEM, SPA, S-M, EMO) and/or sex (PPI, CVLT, ABF, FMEM, EMO). Significance is indicated as  $p < 0.05^a$ ,  $p < 0.01^b$ , or  $p < 0.005^c$ , the latter of which reflects a conservative Bonferroni correction for multiple comparisons of independent variables. Moderate correlations ( $r > 0.3$ ) are shown in bold text.

**eFigure.** Quantile-Quantile Plots for Each of the 11 Endophenotypes

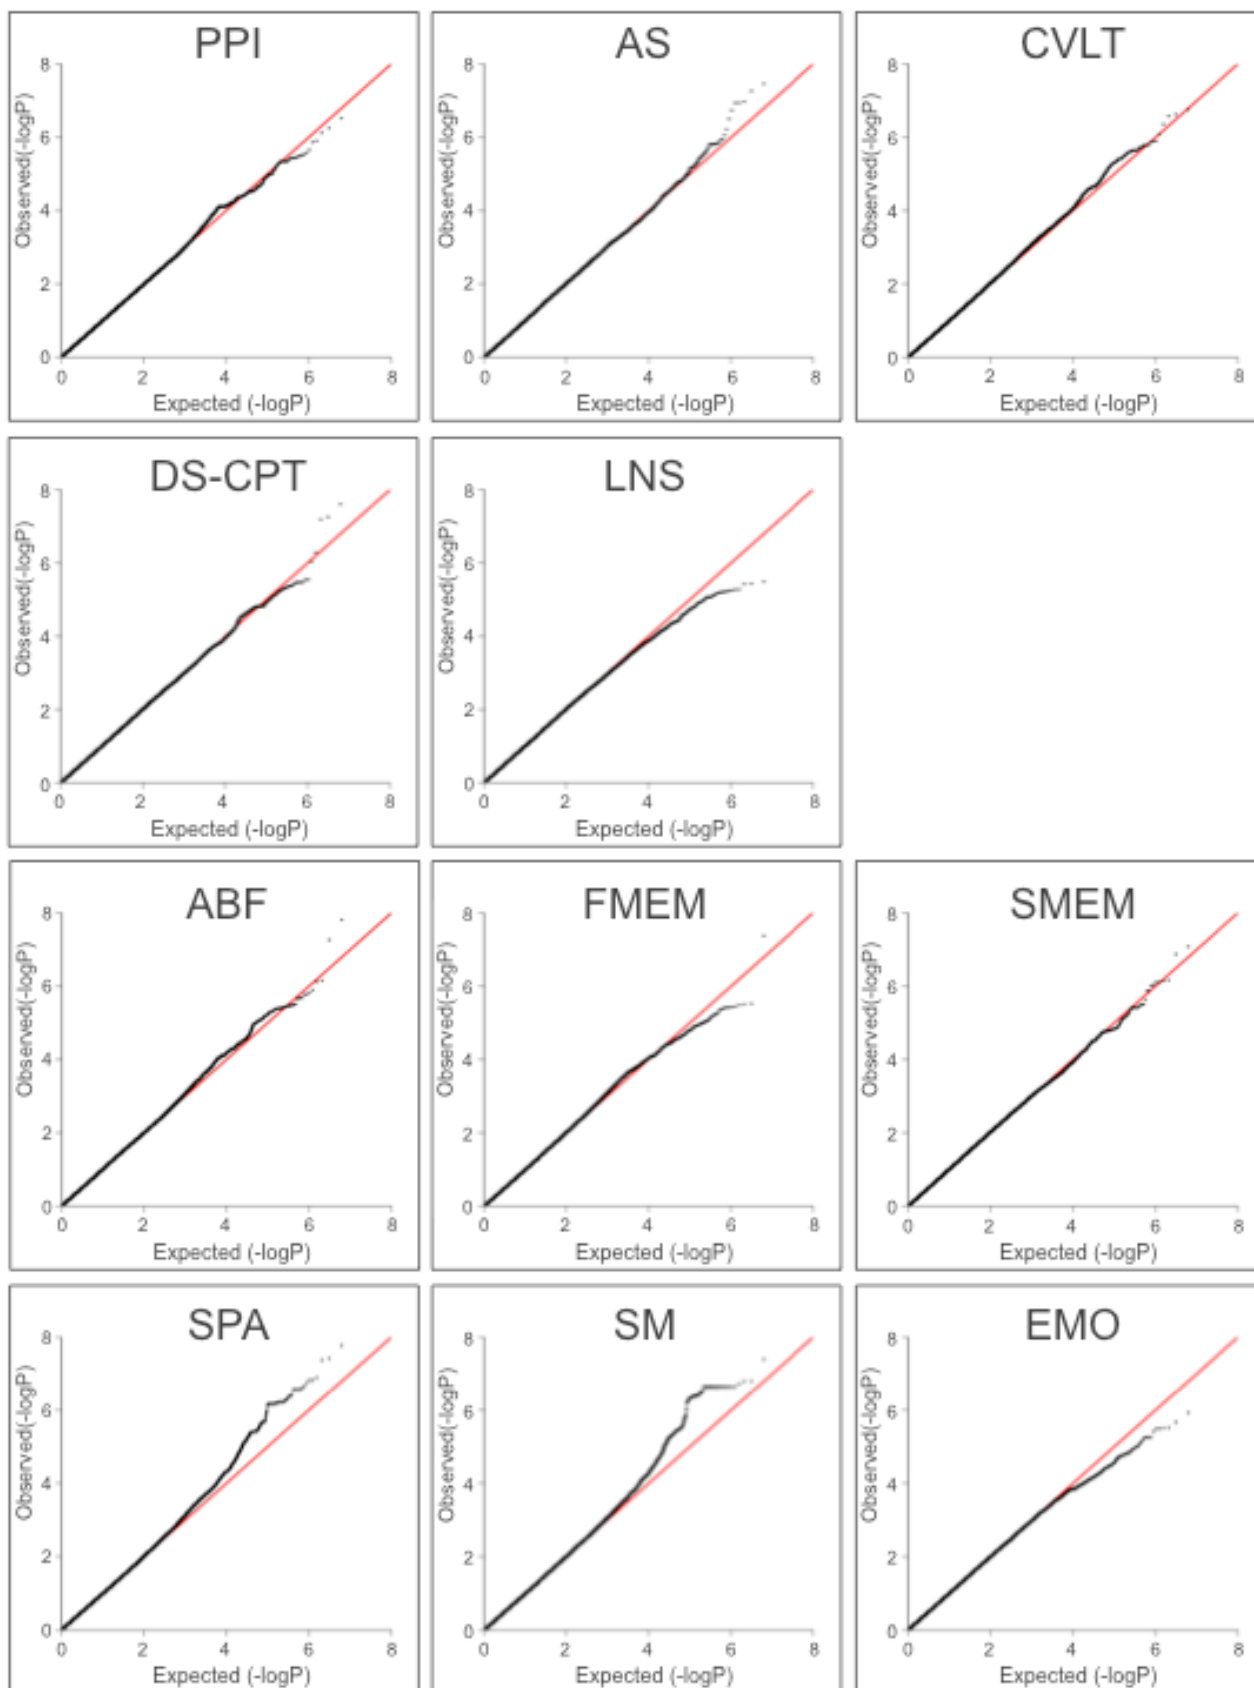

Supplement: jamapsychiatry-76-1274-s001.pdf [file jamapsychiatry-76-1274-s001.pdf]
